# Supplementary material for: Isolation of Pro-Osteogenic Compounds from Euptelea polyandra That Reciprocally Regulate Osteoblast and Osteoclast Differentiation
Source: MDPI journal article supplement (doi:10.3390/ijms242417479), 2023-12-14
Supplement: s1 [file s1]

# Isolation of pro-osteogenic compounds from *Euptelea polyandra* that reciprocally regulate osteoblast and osteoclast differentiation

**Ryuichiro Suzuki** <sup>1,\*</sup>, **Yoshiaki Shirataki** <sup>1</sup>, **Akito Tomomura** <sup>2</sup>, **Kenjiro Bandow** <sup>2</sup>, **Hiroshi Sakagami** <sup>3</sup>  
and **Mineko Tomomura** <sup>1,2,\*</sup>

<sup>1</sup> Department of Pharmaceutical Sciences, Faculty of Pharmacy and Pharmaceutical Sciences, Josai University, 1-1 Keyakidai, Sakado, Saitama, 350-0295 Japan

<sup>2</sup> Division of Biochemistry, Department of Oral Biology & Tissue Engineering, Meikai University School of Dentistry, Sakado, Saitama 350-0283, Japan.

<sup>3</sup> Meikai University Research Institute of Odontology (M-RIO), Sakado, Saitama 350-0283, Japan.

\* Correspondence:

Mineko Tomomura: [mtomomura@josai.ac.jp](mailto:mtomomura@josai.ac.jp); [mineko-t@dent.meikai.ac.jp](mailto:mineko-t@dent.meikai.ac.jp)

Ryuichiro Suzuki: [ryu\\_suzu@josai.ac.jp](mailto:ryu_suzu@josai.ac.jp)

## Contents

**Scheme S1.** Schematic representation of extraction and fractionation of *Euptelea polyandra*

**Scheme S2.** Schematic representation of isolation of compounds from *Euptelea polyandra*

**File S1.** Spectral data of isolated compounds from *Euptelea polyandra*

**Scheme S1.** Schematic representation of extraction and fractionation of *Euptelea polyandra*

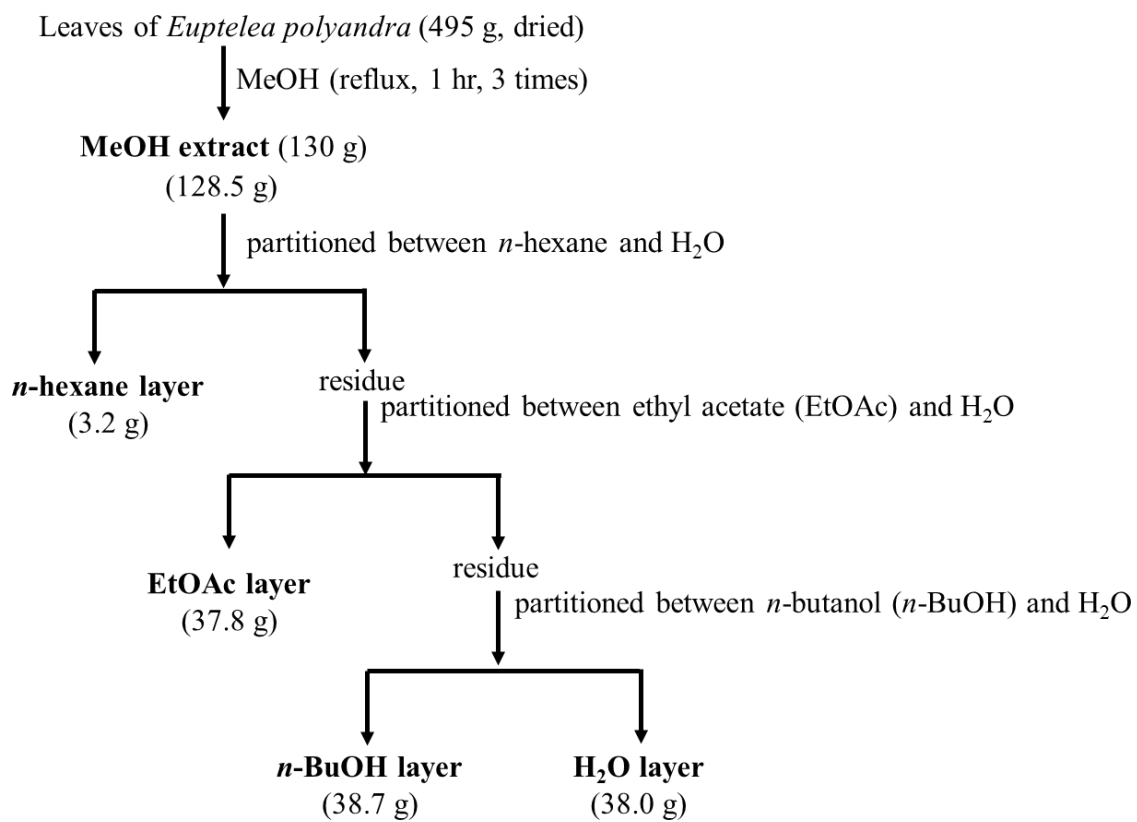

**Scheme S2.** Schematic representation of isolation of compounds from *Euptelea polyandra*

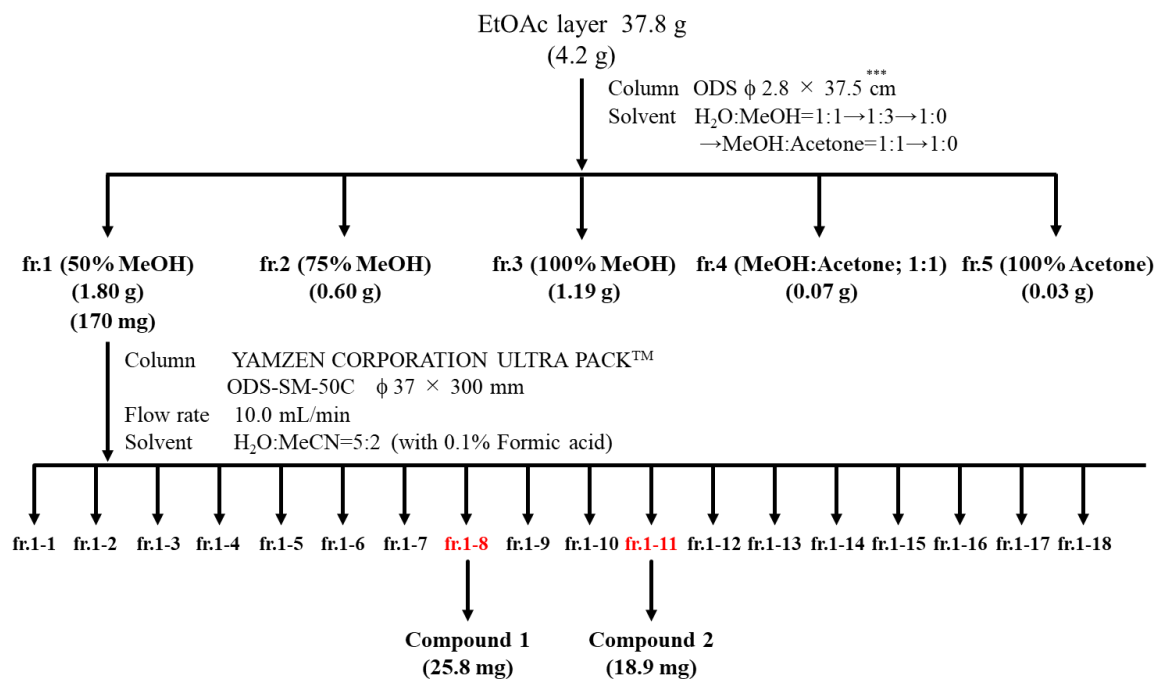

**File S1.** Spectral data of isolated compounds from *Euptelea polyandra*

Isoquercitrin (**1**): yellow powder, FAB-MS  $m/z$  465  $[M+H]^+$ ,  $^{13}C$  NMR (DMSO- $d_6$ )  $\delta_C$ : 60.1 (C-6''), 70.0 (C-4''), 74.1 (C-2''), 76.4 (C-3''), 77.6 (C-5''), 93.5 (C-8), 98.7 (C-6), 100.8 (C-1''), 104.0 (C-10), 115.2 (C-2'), 116.2 (C-5'), 121.2 (C-1'), 121.6 (C-6'), 133.3 (C-3), 144.8 (C-3'), 148.5 (C-4'), 156.2 (C-2), 156.3 (C-9), 161.2 (C-5), 164.2 (C-7), 177.4 (C-4)

Astragalin (**2**): yellow powder, FAB-MS  $m/z$  449  $[M+H]^+$ ,  $^{13}C$  NMR (DMSO- $d_6$ )  $\delta_C$ : 60.8 (C-6''), 69.9 (C-4''), 74.2 (C-2''), 76.4 (C-5''), 77.5 (C-3''), 93.7 (C-8), 98.8 (C-6), 100.9 (C-1''), 103.8 (C-10), 115.1 (C-3', C-5'), 120.1 (C-1'), 130.8 (C-2', C-6'), 133.1 (C-3), 156.1 (C-2), 156.4 (C-9), 160.0 (C-4'), 161.2 (C-5), 164.6 (C-7), 177.4 (C-4)
